# Supplementary material for: Adverse events of hepatic function disorder in Japanese patients with radically unresectable or metastatic renal cell carcinoma treated with pembrolizumab plus axitinib: a post-marketing surveillance study
Source: Springer Nature journal article supplement (doi:10.1007/s10147-025-02708-2), 2025-04-29

## **Electronic Supplementary Material**

*International Journal of Clinical Oncology*

### **Adverse events of hepatic function disorder in Japanese patients with radically unresectable or metastatic renal cell carcinoma treated with pembrolizumab plus axitinib: a post-marketing surveillance study**

Mototsugu Oya<sup>1</sup>, Shotaro Yasuoka<sup>2</sup>, Takuto Tokudome<sup>2</sup>, Toshihiko Minegishi<sup>2</sup>, Masahiro Hamada<sup>3</sup>, Masahiko Ozaki<sup>3</sup>, Shinichiroh Maekawa<sup>3</sup>, Yuichiro Ito<sup>2</sup>

1. Department of Urology, Keio University School of Medicine, Tokyo, Japan
2. Oncology Medical Affairs, MSD K.K., Tokyo, Japan
3. Japan Pharmacovigilance, MSD K.K., Tokyo, Japan

#### **Corresponding author**

Takuto Tokudome

Address: Oncology Medical Affairs, MSD K.K., 1-13-12 Kudan-kita, Chiyoda-ku, Tokyo 102-8667, Japan

Tel: +81-3-6272-1000

E-mail: takuto.tokudome@merck.com

**Online Resource 1.** Background factors associated with AEs of hepatic function disorder for which a causal relationship could not be ruled out with pembrolizumab

For liver function tests (AST, ALT, ALP,  $\gamma$ -GTP, and T-Bil), blood samples were taken and analyzed before the first dose of treatment.

Abbreviations: AEs, adverse events; ALP, alkaline phosphatase; ALT, alanine aminotransferase; AST, aspartate aminotransferase; BMI, body mass index; CI, confidence interval;  $\gamma$ -GTP, gamma-glutamyl transpeptidase; IMDC, International Metastatic RCC Database Consortium; KPS, Karnofsky Performance Status; T-Bil, total bilirubin.

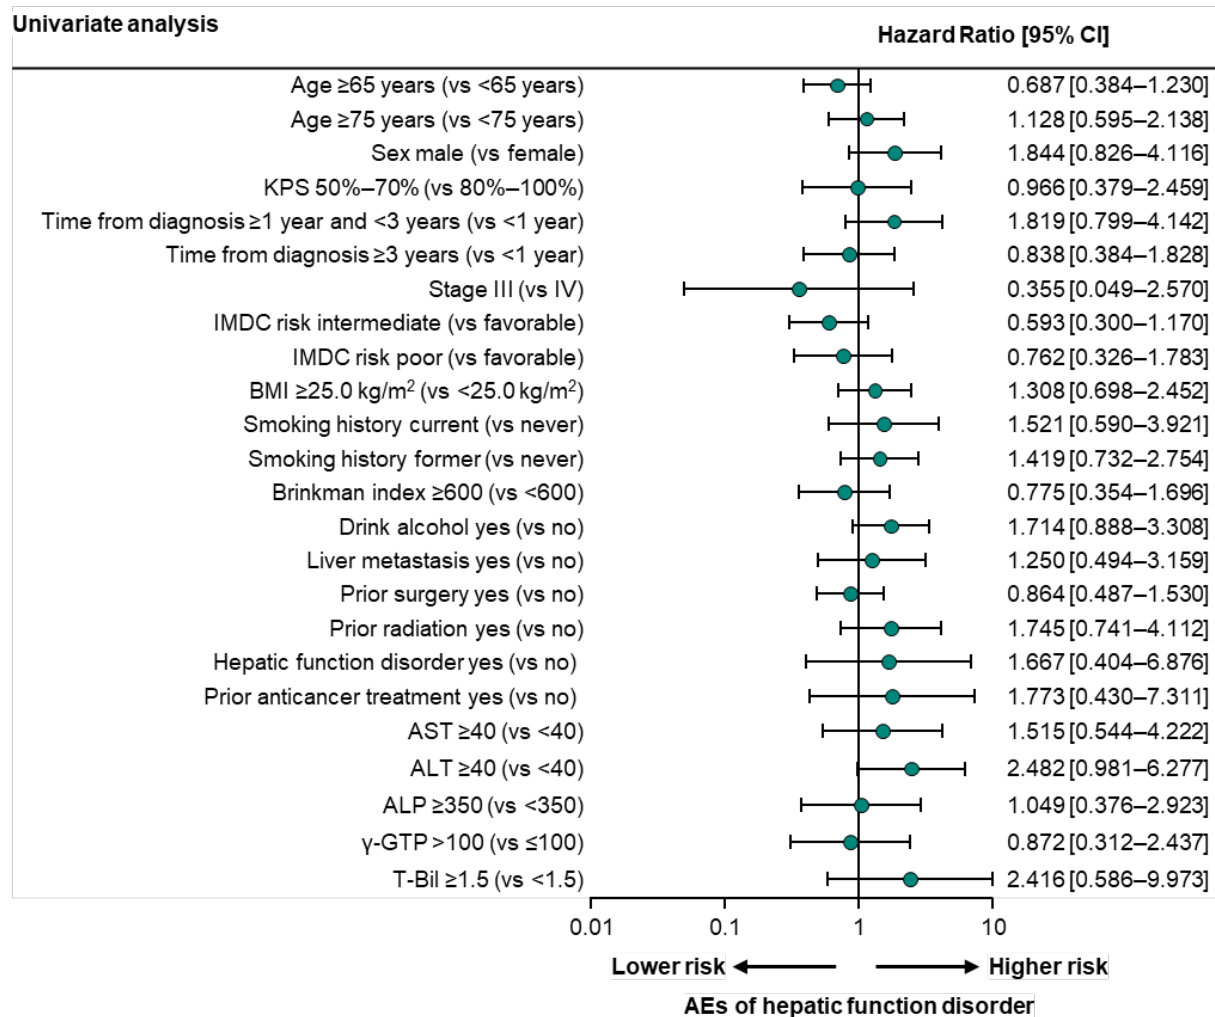

Supplement: MOESM1 [file 10147_2025_2708_MOESM1_ESM.pdf]
